# Supplementary material
Source: Frontiers journal article supplement (https://www.frontiersin.org/articles/1598042)
Supplement: Table_2.docx [file Table_2.docx]

Supplementary Table 2. Cut-off values of clinical variables

| Variables | Cut-off value |
| --- | --- |
| CA19-9 (μ/mL) | 319.6 |
| PNI | 42.3 |
| SII | 909.9 |
| Tumor size (cm) | 6.8 |
| POHS (days) | 15 |

CA199: carbohydrate antigen 199, PNI: prognostic nutritional index, SII: systemic inflammatory index, POHS: post operative hospital stay
