# Supplementary material
Source: Frontiers journal article supplement (https://www.frontiersin.org/articles/1598042)
Supplement: Table_3.docx [file Table_3.docx]

Supplementary Table 3. Cut-off values of body composition for male and female

| Variables | Male | Female |
| --- | --- | --- |
| IMATI | 1.4 | 3.3 |
| SMI | 48.0 | 37.4 |
| SATI | 27.3 | 52.1 |
| VATI | 58.0 | 9.3 |
| VSR | 1.0 | 0.8 |
| FMF | 0.3 | 0.5 |

SATI: subcutaneous adipose tissue index , VATI: visceral adipose tissue index, VSR: VAT to SAT area ratio, SMI: skeletal muscle index, IMATI: intermuscular adipose tissue index, FMF: fatty muscle fraction
